# Supplementary material for: A robust, agnostic molecular biosignature based on machine learning
Source: PubMed Central journal article supplement — Proc Natl Acad Sci U S A. 2023 Sep 25;120(41):e2307149120. doi: 10.1073/pnas.2307149120 (PMC10576141; doi:10.1073/pnas.2307149120), 2023-09-25
Supplement: pnas.2307149120.sapp.pdf [file pnas.2307149120.sapp.pdf]

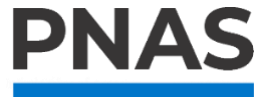

**Supporting Information for:**

**A robust, agnostic molecular biosignature based on  
machine learning**

**H. James Cleaves II, Grethe Hystad, Anirudh Prabhu, Michael L. Wong,  
George D. Cody, Sophia Economon, and Robert M. Hazen**

**Corresponding Author: Robert M. Hazen**

**Email: [rhazen@ciw.edu](mailto:rhazen@ciw.edu)**

**This PDF file includes: Table S1**

**Table S1.** Tabulation of 134 samples analyzed in this study.

| Sample Number | Sample Name     | Sample Description                                                                                                                                                                                   | Age (Ma) | Classification |
|---------------|-----------------|------------------------------------------------------------------------------------------------------------------------------------------------------------------------------------------------------|----------|----------------|
| 1             | ADGCONT3d.txt   | Alkaline degraded $\beta$ -D-glucose                                                                                                                                                                 | 0        | A              |
| 2             | AKG3d.txt       | Commercial $\alpha$ -keto glutarate                                                                                                                                                                  | 0        | A              |
| 3             | Ala333.txt      | Commercial tri-L-alanine                                                                                                                                                                             | 0        | A              |
| 4             | AlaMR3d.txt     | Maillard reaction of DL Alanine and $\beta$ -D-glucose                                                                                                                                               | 0        | A              |
| 5             | Alanine3d.txt   | Commercial DL Alanine                                                                                                                                                                                | 0        | A              |
| 6             | Albertit3d.txt  | Albertite. Asphalt like substance from Albert County, New Brunswick, Canada                                                                                                                          | 359-419  | B              |
| 7             | Allende23d.txt  | Allende Meteorite. Meteorite seen to fall near Pueblito de Allende, Mexico Feb. 1 1969. Kind gift of Professor Alan Schwartz.                                                                        | ~4500    | A              |
| 8             | Allende3d.txt   | Allende Meteorite. Meteorite seen to fall near Pueblito de Allende, Mexico Feb. 1 1969. Kind gift of Professor Alan Schwartz.                                                                        | ~4500    | A              |
| 9             | AMAX.3d.txt     | AMAX coal                                                                                                                                                                                            | ND       | B              |
| 10            | ASPHLTMM3d.txt  | Asphaltum, Trinidad. Black, highly viscous liquid or semi-solid form of petroleum, commonly referred to as asphalt.                                                                                  | ND       | B              |
| 11            | ASPMR.3d.txt    | Maillard reaction of DL-aspartic acid reacted with $\beta$ -D-glucose                                                                                                                                | 0        | A              |
| 12            | BARLEY.3d.txt   | <i>Hordeum vulgare</i> , Barley kernal                                                                                                                                                               | 0        | B              |
| 13            | BASMATI.3d.txt  | <i>Oryza sativa</i> , Basmati rice grain                                                                                                                                                             | 0        | B              |
| 14            | BBRsoil1.3d.txt | Soil from Broad Branch creek area<br>38°57'28.1"N 77°03'48.0"W                                                                                                                                       | 0        | B              |
| 15            | Bcereus3d.txt   | <i>Bacillus cereus</i> . Ward's scientific. Gram-positive rod-shaped bacterium commonly found in soil, food, and marine sponges. <i>B. cereus</i> bacteria may be anaerobes or facultative anaerobes | 0        | B              |

|    |                |                                                                                                                                                                                                                                                                                                                                                                                                                                         |       |   |
|----|----------------|-----------------------------------------------------------------------------------------------------------------------------------------------------------------------------------------------------------------------------------------------------------------------------------------------------------------------------------------------------------------------------------------------------------------------------------------|-------|---|
| 16 | Biofil.3d.txt  | Biofilm from Broad Brach<br>38°57'27.0"N 77°03'45.9"W                                                                                                                                                                                                                                                                                                                                                                                   | 0     | B |
| 17 | Bonnetf3d.txt  | Common Bonnet Fungus (cap, basidiomycete),<br><i>Mycena galericulata</i>                                                                                                                                                                                                                                                                                                                                                                | 0     | B |
| 18 | brnrice3d.txt  | <i>Oryza sativa</i> , Brown rice grain,                                                                                                                                                                                                                                                                                                                                                                                                 | 0     | B |
| 19 | Bsubtil3d.txt  | <i>Bacillus subtilis</i> cells, Ward's Scientific                                                                                                                                                                                                                                                                                                                                                                                       | 0     | B |
| 20 | Bulgur3d.txt   | <i>Triticum durum</i> , Bulgur wheat kernal                                                                                                                                                                                                                                                                                                                                                                                             | 0     | B |
| 21 | Cannak3d.txt   | Cannak meteorite                                                                                                                                                                                                                                                                                                                                                                                                                        | ~4500 | A |
| 22 | Cannelco3d.txt | Cannel Coal. Cannel coal or candle coal is a<br>type of bituminous, pollen-derived coal.                                                                                                                                                                                                                                                                                                                                                | ND    | B |
| 23 | Carnos3d.txt   | Carnarum Creek Oil Shale, Australia                                                                                                                                                                                                                                                                                                                                                                                                     | ND    | B |
| 24 | Cedarto3d.txt  | Cedar wood t0 from Cody Fogel expt.                                                                                                                                                                                                                                                                                                                                                                                                     | 0     | B |
| 25 | Chiles3d.txt   | <i>Capsicum chinense</i> , Habanero chile seed                                                                                                                                                                                                                                                                                                                                                                                          | 0     | B |
| 26 | Chiltin3d.txt  | Chitin. Chitin is a long-chain polymer of N-<br>acetylglucosamine. Chitin is probably the<br>second most abundant polysaccharide in nature<br>(after cellulose); an estimated 1 billion tons of<br>chitin are produced each year in the biosphere<br>It is a primary component of cell walls in fungi,<br>the exoskeletons of arthropods, the radulae,<br>cephalopod beaks and gladii of molluscs and in<br>some nematodes and diatoms. | 0     | B |
| 27 | Citron3d.txt   | Citronella candle                                                                                                                                                                                                                                                                                                                                                                                                                       | 0     | B |
| 28 | CIWSoil13d.txt | Soil from EPL campus                                                                                                                                                                                                                                                                                                                                                                                                                    | 0     | B |
| 29 | Collagen3d.txt | Commercial collagen. Collagen is the main<br>structural protein in the extracellular matrix<br>found in the human connective tissues. As the<br>main component of connective tissue, it is the<br>most abundant protein in mammals, making up<br>from 25% to 35% of the whole-body protein<br>content.                                                                                                                                  | 0     | B |
| 30 | CRDPAR3d.txt   | <i>Stereum complicatum</i> , "Crowded parchment"<br>wood fungus from Rock Creek Park                                                                                                                                                                                                                                                                                                                                                    | 0     | B |

|    |                |                                                                                                                                                                                                                                                  |          |   |
|----|----------------|--------------------------------------------------------------------------------------------------------------------------------------------------------------------------------------------------------------------------------------------------|----------|---|
| 31 | Cyanob23d.txt  | Mixed freshwater cyanobacteria, Ward's Scientific                                                                                                                                                                                                | 0        | B |
| 32 | Cyanob3d.txt   | Mixed freshwater cyanobacteria, Ward's Scientific                                                                                                                                                                                                | 0        | B |
| 33 | CysMR23d.txt   | Maillard reaction of DL-cysteine reacted with $\beta$ -D glucose                                                                                                                                                                                 | 0        | A |
| 34 | CysMR3d.txt    | Maillard reaction of DL-cysteine reacted with $\beta$ -D glucose                                                                                                                                                                                 | 0        | A |
| 35 | Devons3d.txt   | Devonian Shale                                                                                                                                                                                                                                   | 60-419   | B |
| 36 | DGlucose3d.txt | $\beta$ -D-glucose, Sigma Aldrich                                                                                                                                                                                                                | 0        | A |
| 37 | DNA3d.txt      | Commercial DNA (from <i>Saccharomyces cerevisiae</i> )                                                                                                                                                                                           | 0        | A |
| 38 | ECO33DB.txt    | <i>Escherichia coli</i> , Ward's Scientific                                                                                                                                                                                                      | 0        | B |
| 39 | Ecoli13d.txt   | <i>Escherichia coli</i> , Ward's Scientific                                                                                                                                                                                                      | 0        | B |
| 40 | ED513933d.txt  | Miller Urey experiment                                                                                                                                                                                                                           | 0        | A |
| 41 | Elaterit3d.txt | Elaterite. Also known as Aeonite, 'elastic bitumen', 'mineral caoutchouc' or Wurtzilite) is a brown hydrocarbon varying somewhat in consistency, being sometimes soft, elastic and sticky, like India rubber, and occasionally hard and brittle. | ND       | B |
| 42 | Entaer3d.txt   | <i>Klebsiella aerogenes</i> , previously known as <i>Enterobacter aerogenes</i> , is a Gram-negative, rod-shaped bacterium.                                                                                                                      | 0        | B |
| 43 | Ferron3d.txt   | Ferron Coalified Wood, Ferron Coal Bed, Utah                                                                                                                                                                                                     | 100.5-66 | B |
| 44 | GCN3d.txt      | Commercial glycolonitrile, Sigma Aldrich                                                                                                                                                                                                         | 0        | A |
| 45 | Gelatin3d.txt  | Commercial gelatin. Gelatin is collagen that has been irreversibly hydrolyzed.                                                                                                                                                                   | 0        | B |
| 46 | GlnMR3d.txt    | Maillard reaction of DL-glutamine reacted with $\beta$ -D-glucose                                                                                                                                                                                | 0        | A |
| 47 | GluMR23d.txt   | Maillard reaction of DL-glutamic acid reacted with $\beta$ -D-glucose                                                                                                                                                                            | 0        | A |
| 48 | GluMR3d.txt    | Maillard reaction of DL-glutamic acid reacted with $\beta$ -D-glucose                                                                                                                                                                            | 0        | A |

|    |                |                                                                                                                                                                                                                                 |       |   |
|----|----------------|---------------------------------------------------------------------------------------------------------------------------------------------------------------------------------------------------------------------------------|-------|---|
| 49 | Glycine3d.txt  | Commercial glycine, Sigma Aldrich                                                                                                                                                                                               | 0     | A |
| 50 | GlyMR3d.txt    | Maillard reaction of glycine reacted with $\beta$ -D-glucose                                                                                                                                                                    | 0     | A |
| 51 | Glyoxaci3d.txt | Glyoxylic acid, Sigma Aldrich                                                                                                                                                                                                   | 0     | A |
| 52 | Grass3d.txt    | Common bluegrass, <i>Poa pratensis</i> , from CIW lawn                                                                                                                                                                          | 0     | B |
| 53 | Gnrnrvs3d.txt  | Green River Shale. The Green River Formation is an Eocene geologic formation that records the sedimentation in a group of intermountain lakes in three basins along the present-day Green River in Colorado, Wyoming, and Utah. | 34-56 | B |
| 54 | Hair3d.txt     | Human hair                                                                                                                                                                                                                      | 0     | B |
| 55 | HCN531723d.txt | HCN polymer<br>Reaction started May 31, 1972, Stanley L. Miller collection                                                                                                                                                      | 0     | A |
| 56 | HMT3d.txt      | Commercial Hexamethylenetetramine<br>Sigma Aldrich                                                                                                                                                                              | 0     | A |
| 57 | Humica3d.txt   | Humic Acid, Mallinckrodt                                                                                                                                                                                                        | 0     | B |
| 58 | Jetwhtby3d.txt | Jet from Whitby, UK. Jet is a product of decomposition of wood from millions of years ago, commonly the wood of trees of the family <i>Araucariaceae</i> .                                                                      | 180   | B |
| 59 | Kraton23d.txt  | Kraton polymer. Kraton polymers are styrenic block copolymers (SBC) consisting of polystyrene blocks and rubber blocks. The rubber blocks consist of polybutadiene, polyisoprene, or their hydrogenated equivalents.            | 0     | A |
| 60 | Kraton3d.txt   | See above                                                                                                                                                                                                                       | 0     | A |
| 61 | LAsp3d.txt A   | Commercial L-Aspartic Acid                                                                                                                                                                                                      | 0     | A |
| 62 | Lcys3d.txt     | Commercial L-Cysteine                                                                                                                                                                                                           | 0     | A |

|    |                |                                                                                                                                                                                                                                                                                                                                                    |    |   |
|----|----------------|----------------------------------------------------------------------------------------------------------------------------------------------------------------------------------------------------------------------------------------------------------------------------------------------------------------------------------------------------|----|---|
| 63 | Lescel3d.txt   | <i>Ficaria verna</i> (formerly <i>Ranunculus ficaria</i> L.), commonly known as lesser celandine or pilewort, is a low-growing, hairless perennial flowering plant in the buttercup family <i>Ranunculaceae</i> native to Europe and Western Asia. It is an invasive species in North America, where it is known by the common name fig buttercup. | 0  | B |
| 64 | Leuglulq3d.txt | Maillard reaction of DL-leucine reacted with $\beta$ -D-glucose, liquid fraction                                                                                                                                                                                                                                                                   | 0  | A |
| 65 | Leugluml3d.txt | Maillard reaction of DL-leucine reacted with $\beta$ -D-glucose, solid fraction                                                                                                                                                                                                                                                                    | 0  | A |
| 66 | Lgln3d.txt     | Commercial L-glutamine                                                                                                                                                                                                                                                                                                                             | 0  | A |
| 67 | Lglu3d.txt     | Commercial L-glutamic acid                                                                                                                                                                                                                                                                                                                         | 0  | A |
| 68 | Lhis3d.txt     | Commercial L-histidine                                                                                                                                                                                                                                                                                                                             | 0  | A |
| 69 | Lichen3d.txt   | Unidentified lichen species from Broad Branch Road area<br>38°57'28.1"N 77°03'48.0"W                                                                                                                                                                                                                                                               | 0  | B |
| 70 | Lleu3d.txt     | Commercial L-leucine                                                                                                                                                                                                                                                                                                                               | 0  | A |
| 71 | Llys3d.txt     | Commercial L-lysine                                                                                                                                                                                                                                                                                                                                | 0  | A |
| 72 | Lmet3d.txt     | Commercial L-methionine                                                                                                                                                                                                                                                                                                                            | 0  | A |
| 73 | Lphe3d.txt     | Commercial L-Phenylalanine                                                                                                                                                                                                                                                                                                                         | 0  | A |
| 74 | Lpro3d.txt     | Commercial L-proline                                                                                                                                                                                                                                                                                                                               | 0  | A |
| 75 | Lser3d.txt     | Commercial L-Serine                                                                                                                                                                                                                                                                                                                                | 0  | A |
| 76 | Ltyr3d.txt     | Commercial L-Tyrosine                                                                                                                                                                                                                                                                                                                              | 0  | A |
| 77 | Lysmr3d.txt    | Maillard reaction of L-lysine reacted with $\beta$ -D-glucose                                                                                                                                                                                                                                                                                      | 0  | A |
| 78 | Malic3d.txt    | Commercial DL Malic Acid                                                                                                                                                                                                                                                                                                                           | 0  | A |
| 79 | MetMRLQ3d.txt  | Maillard reaction of L-methionine reacted with $\beta$ -D-glucose, liquid fraction                                                                                                                                                                                                                                                                 | 0  | A |
| 80 | Metseqah3d.txt | Metasequoia, Sample B, from Axel Heiberg island.                                                                                                                                                                                                                                                                                                   | 45 | B |

|    |               |                                                                                                                                                     |         |   |
|----|---------------|-----------------------------------------------------------------------------------------------------------------------------------------------------|---------|---|
| 81 | Miclut3d.txt  | <i>Micrococcus luteus</i> , Gram-positive to Gram-variable, obligate aerobe, nonmotile, tetrad-arranging, pigmented, saprotrophic coccus bacterium. | 0       | B |
| 82 | Moss3d.txt    | Unidentified moss species from Rock Creek Park                                                                                                      | 0       | B |
| 83 | Mythic3d.txt  | <i>Mythicomycetes</i> fungus species                                                                                                                | 0       | B |
| 84 | Nrk1_RT3d.txt | Reaction of acetaldehyde, formaldehyde and ammonia conducted at 25° C                                                                               | 0       | A |
| 85 | Nrk2_853d.txt | Reaction of acetaldehyde, formaldehyde and ammonia conducted at 85° C                                                                               | 0       | A |
| 86 | Nrk2rt3d.txt  | Reaction of acetaldehyde, formaldehyde and ammonia conducted at 25° C                                                                               | 0       | A |
| 87 | Nrka1853d.txt | Reaction of acetaldehyde, formaldehyde and ammonia conducted at 85° C                                                                               | 0       | A |
| 88 | Nylon3d.txt   | Nylon 6,6                                                                                                                                           | 0       | A |
| 89 | OakLeaf3d.txt | <i>Quercus alba</i> , Oak leaf                                                                                                                      | 0       | B |
| 90 | Oat3d.txt     | <i>Avena sativa</i> , Oat                                                                                                                           | 0       | B |
| 91 | Okra3d.txt    | <i>Abelmoschus esculentus</i> , Okra seed                                                                                                           | 0       | B |
| 92 | p1165lp3d.txt | Hexamethylenetetramine (HMT) heated with Fe <sub>2</sub> O <sub>3</sub>                                                                             | 0       | A |
| 93 | p1165ls3d.txt | HMT heated with Fe <sub>2</sub> O <sub>3</sub>                                                                                                      | 0       | A |
| 94 | p118l2s3d.txt | Aqueous sodium ferrocyanide, sunlight irradiated                                                                                                    | 0       | A |
| 95 | p82_30B3d.txt | Bradford Crude Petroleum; The Bradford oil field is located mainly in McKean County of northwestern Pennsylvania.                                   | ND      | B |
| 96 | p82_313d.txt  | Bell Creek Petroleum, The Bell Creek Field is a Lower Cretaceous stratigraphic trap in the Muddy Sandstone                                          | 100-145 | B |
| 97 | p82_31B3d.txt | Bell Creek Petroleum; The Bell Creek Field is a Lower Cretaceous stratigraphic trap in a muddy sandstone.                                           | 100-145 | B |
| 98 | p82_323d.txt  | Exxon 44647 Petroleum                                                                                                                               | ND      | B |

|     |                |                                                                                                                          |         |   |
|-----|----------------|--------------------------------------------------------------------------------------------------------------------------|---------|---|
| 99  | p82_403d.txt   | Formose/NH <sub>3</sub> 150° C                                                                                           | 0       | A |
| 100 | p82_473d.txt   | Pyruvic Acid polymer                                                                                                     | 0       | A |
| 101 | p82_513d.txt   | Formose/NH <sub>3</sub> 85° C                                                                                            | 0       | A |
| 102 | p82_523d.txt   | Formose 25° C                                                                                                            | 0       | A |
| 103 | p825085C3d.txt | Formose 85° C                                                                                                            | 0       | A |
| 104 | p8253fr3d.txt  | Formose NH <sub>3</sub> 25° C                                                                                            | 0       | A |
| 105 | pacampa23d.txt | Polyacrylamide-co acrylic acid Ave Mw 15 million Aldrich                                                                 | 0       | A |
| 106 | pacampac3d.txt | Polyacrylamide-co acrylic acid Ave Mw 15 million Aldrich                                                                 | 0       | A |
| 107 | peat3d.txt     | Peat, Somerset England                                                                                                   | 0.012   | B |
| 108 | pemagma3d.txt  | Polyethylene co-methacrylate co-glycidyl methacrylate                                                                    | 0       | A |
| 109 | phemr3d.txt    | Maillard reaction of L-phenylalanine reacted with β-D glucose                                                            | 0       | A |
| 110 | Pitt8Coa3d.txt | Pitt Coal, The Pittsburgh Coal Seam is the thickest and most extensive coal bed in the Appalachian Basin.                | 265-330 | B |
| 111 | ProMR3d.txt    | Maillard reaction of L-proline reacted with β-D glucose                                                                  | 0       | A |
| 112 | Pumpkin3d.txt  | Pumpkin, <i>Cucurbita pepo</i>                                                                                           | 0       | B |
| 113 | Quisqui3d.txt  | Quisquite, Peru, S-rich bitumen-like material.                                                                           | ND      | B |
| 114 | Rdlent3d.txt   | <i>Lens esculenta</i> , Red lentil                                                                                       | 0       | B |
| 115 | RNA3d.txt      | Commercial RNA from <i>Saccharomyces cerevisiae</i>                                                                      | 0       | A |
| 116 | Scerev3d.txt   | <i>Saccharomyces cerevesiae</i> , Common yeast                                                                           | 0       | B |
| 117 | SerMar3d.txt   | <i>Serratia marcescens</i> . Rod-shaped, Gram-negative bacteria in the family <i>Yersiniaceae</i> . Facultative anaerobe | 0       | B |
| 118 | SerMRSO3d.txt  | Maillard reaction of L-serine reacted with β-D-glucose, solid fraction                                                   | 0       | A |



|     |                |                                                                                                                                                                                                                                                                                                                         |         |   |
|-----|----------------|-------------------------------------------------------------------------------------------------------------------------------------------------------------------------------------------------------------------------------------------------------------------------------------------------------------------------|---------|---|
| 119 | Shungite3d.txt | Shungite, near Shunga village, Karelia, Russia. Shungite is a black and lustrous mineraloid. Stratified shungite-bearing deposits that retain sedimentary structures are interpreted as metamorphosed oil source rocks. Some diapiric structures have been identified, which are interpreted as possible mud volcanoes. | ~2000   | B |
| 120 | SIOM25023d.txt | Synthetic Insoluble Organic Matter prepared from dextrose, water and ammonia, heated to 250° C<br>George Cody                                                                                                                                                                                                           | 0       | A |
| 121 | SIOM250D3d.txt | Synthetic Insoluble Organic Matter prepared from dextrose, water and ammonia, heated to 250° C<br>George Cody                                                                                                                                                                                                           | 0       | A |
| 122 | Sodpyr3d.txt   | Commercial sodium pyruvate, Sigma Aldrich                                                                                                                                                                                                                                                                               | 0       | A |
| 123 | Staepi3d.txt   | <i>Staphylococcus epidermidis</i> . Ward's scientific. Gram-positive, facultative anaerobic bacteria.                                                                                                                                                                                                                   | 0       | B |
| 124 | Strob3d.txt    | High pressure polymer of diphenylbutadiene                                                                                                                                                                                                                                                                              | 0       | A |
| 125 | TAGL5b3d.txt   | Tagish Lake meteorite fraction 5b                                                                                                                                                                                                                                                                                       | ~4500   | A |
| 126 | TAGLIII3d.txt  | Tagish Lake meteorite fraction III                                                                                                                                                                                                                                                                                      | ~4500   | A |
| 127 | TAGLIIV3d.txt  | Tagish Lake meteorite fraction IIV                                                                                                                                                                                                                                                                                      | ~4500   | A |
| 128 | TAGLKIIH3d.txt | Tagish Lake meteorite fraction IIH                                                                                                                                                                                                                                                                                      | ~4500   | A |
| 129 | TAGLold3d.txt  | Tagish Lake meteorite combined fractions                                                                                                                                                                                                                                                                                | ~4500   | A |
| 130 | TgkIIH23d.txt  | Tagish Lake meteorite fraction IIH                                                                                                                                                                                                                                                                                      | ~4500   | A |
| 131 | TgkIIV23d.txt  | Tagish Lake meteorite fraction IIV                                                                                                                                                                                                                                                                                      | ~4500   | A |
| 132 | Torbanit3d.txt | Torbanite, near Edinburgh, Scotland. Also known as boghead coal or channel coal, is a variety of fine-grained black oil shale. Generally occurs as lenticular masses associated with Permian coal deposits. Torbanite is classified as lacustrine type oil shale.                                                       | 252-299 | B |
| 133 | Tyrglumr3d.txt | Maillard reaction of L-tyrosine reacted with $\beta$ -D-glucose                                                                                                                                                                                                                                                         | 0       | A |
| 134 | Westflds3d.txt | Westfield Oil Shale, Scotland                                                                                                                                                                                                                                                                                           | 300-360 | B |
